# Supplementary material
Source: Springer Nature journal article supplement (https://www.springermedizin.de/resource/supplementary/12936_2013_3152_MOESM11_ESM.pdf/9546286)

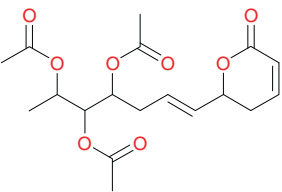

Lippialactone (105)

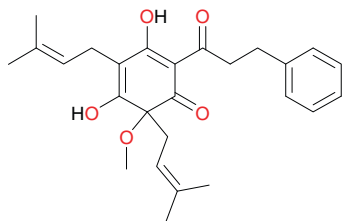

Helihumulone (106)

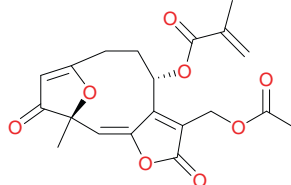

Hirsutinolide 1 (107)

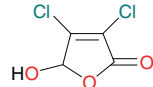

Mucochloric acid (109)

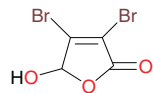

Mucobromic acid (110)

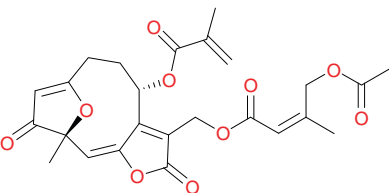

Hirsutinolide 2 (108)

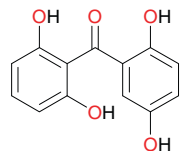

2,5,2',6'-Tetrahydroxybenzophenone (111)

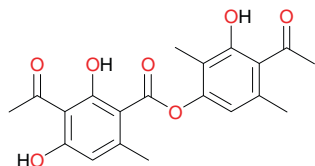

Atranorin (114)

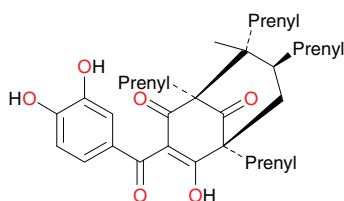

Guttiferone A (112)

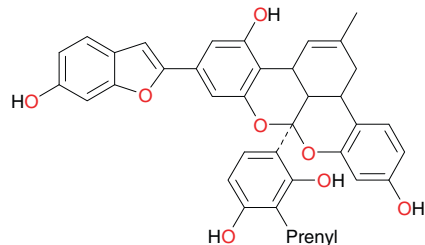

Mulberrofuran F (113)

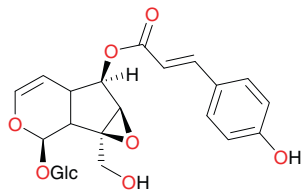

Specioside (115)

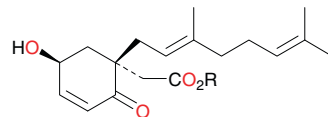

Methyl 2-(1'-geranyl-5'-hydroxy-2'-oxocyclohex-3'-enyl) acetate (116): R = Me  
2-(1'-Geranyl-5'-hydroxy-2'-oxocyclohex-3'-enyl)acetic acid (117): R = H

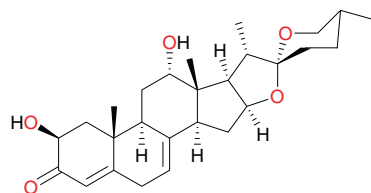

Muzanzagenin (118)

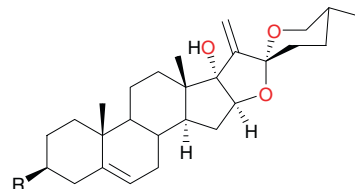

Spiroconazole A (119)

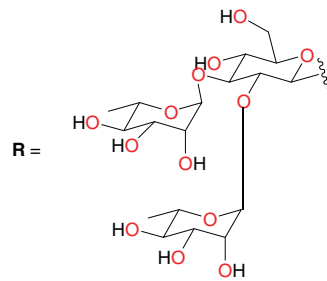

Supplement: MOESM11 [file 9546286]
